# Supplementary material
Source: PubMed Central journal article supplement (PMC5766904)
Supplement: supp_RA117.000564_133343_1_supp_25239_qzksl4.pdf [file supp_RA117.000564_133343_1_supp_25239_qzksl4.pdf]

## **Supplemental Data**

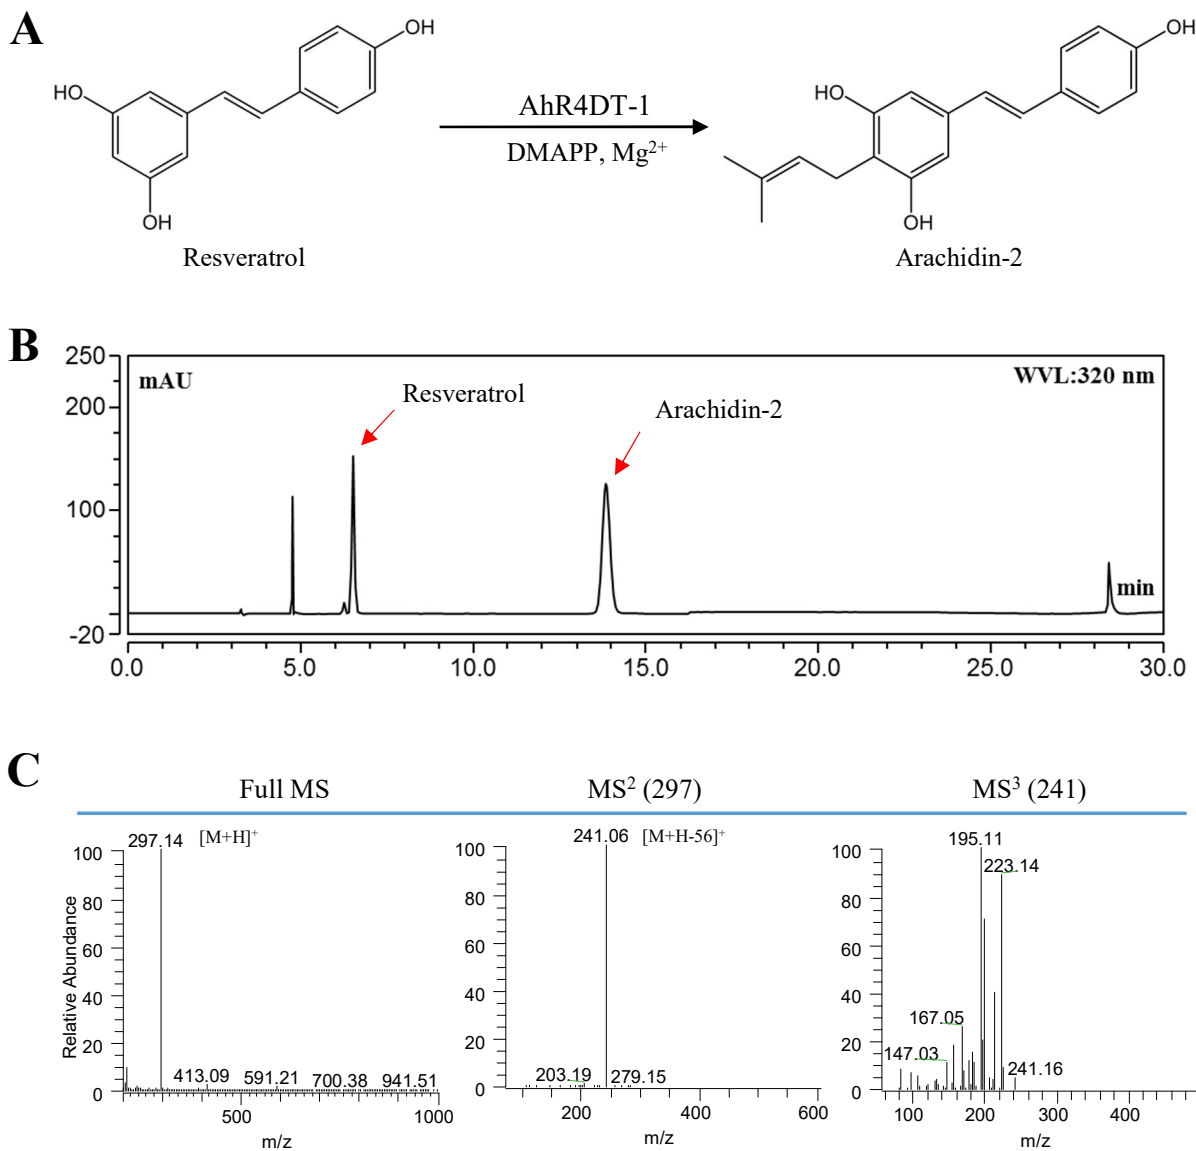

**Figure S1. Prenylation of resveratrol by AhR4DT-1.**

Prenylation activity of AhR4DT-1 in microsomal fraction of *Nicotiana benthamiana* leaf after vacuum infiltration with *Agrobacterium tumefaciens* LBA4404 harboring pBIB-Kan-AhR4DT-1.

(A) Chemical structures of resveratrol and its prenylated product, arachidin-2.

(B) HPLC chromatograms (UV 320 nm) of ethyl acetate extraction of reaction mixtures contained 100  $\mu\text{M}$  resveratrol, 300  $\mu\text{M}$  DMAPP, 10 mM  $\text{MgCl}_2$ , 5 mM DTT and 30  $\mu\text{g}$  microsomal fraction in a pH 9.0 Tris-HCl buffer for 40 min.

(C) HPLC-PAD-ESI- $\text{MS}^3$  analysis of prenylated product, arachidin-2.

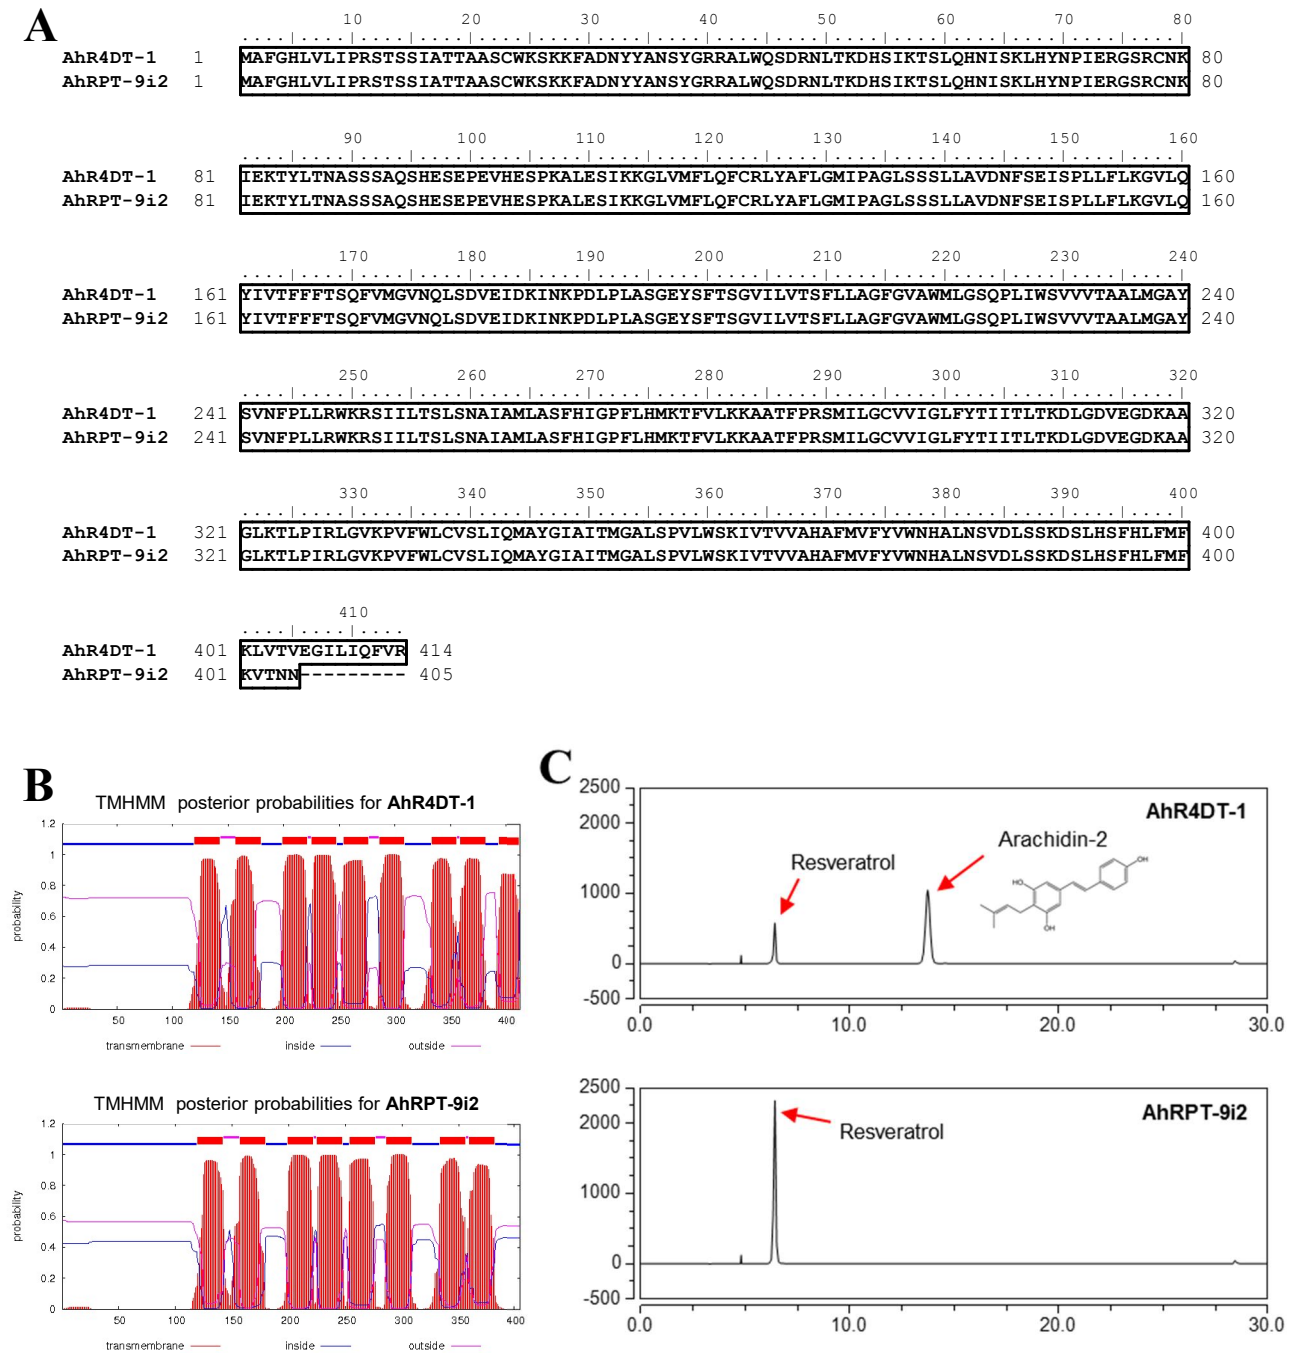

**Figure S2. Comparison of AhR4DT-1 and AhRPT-9i2.**

(A) Alignment of AhR4DT-1 with AhRPT-9i2 was performed using ClustalX.

(B) Potential transmembrane domains of AhR4DT-1 and AhRPT-9i2 were predicted by TMHMM.

(C) Resveratrol prenylation activity of AhR4DT-1 and AhRPT-9i2 were analyzed by using HPLC.

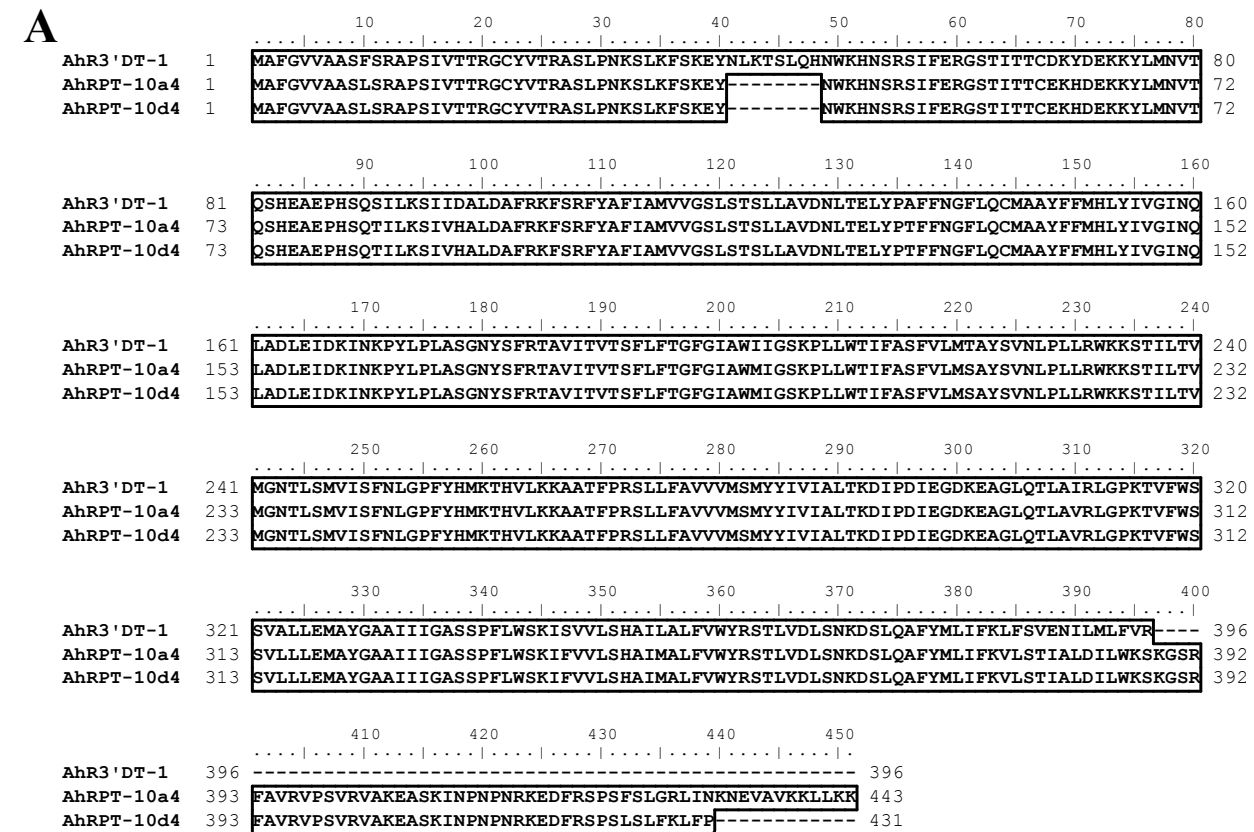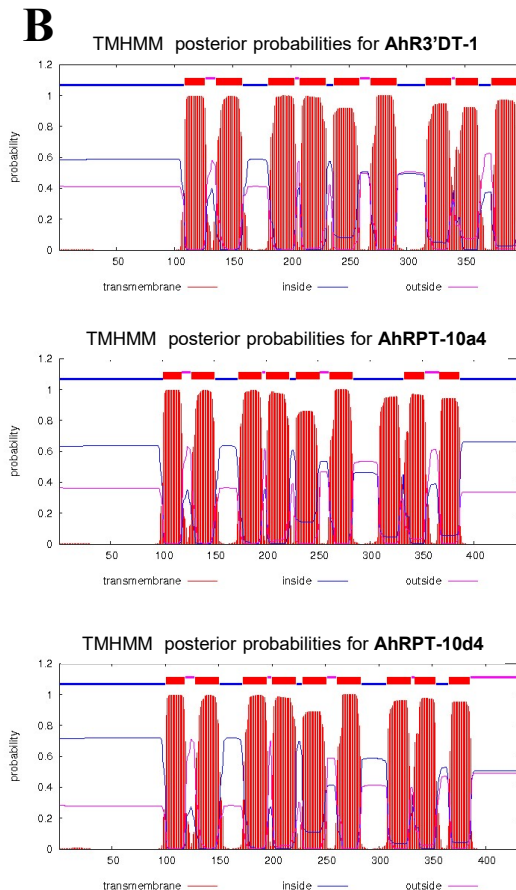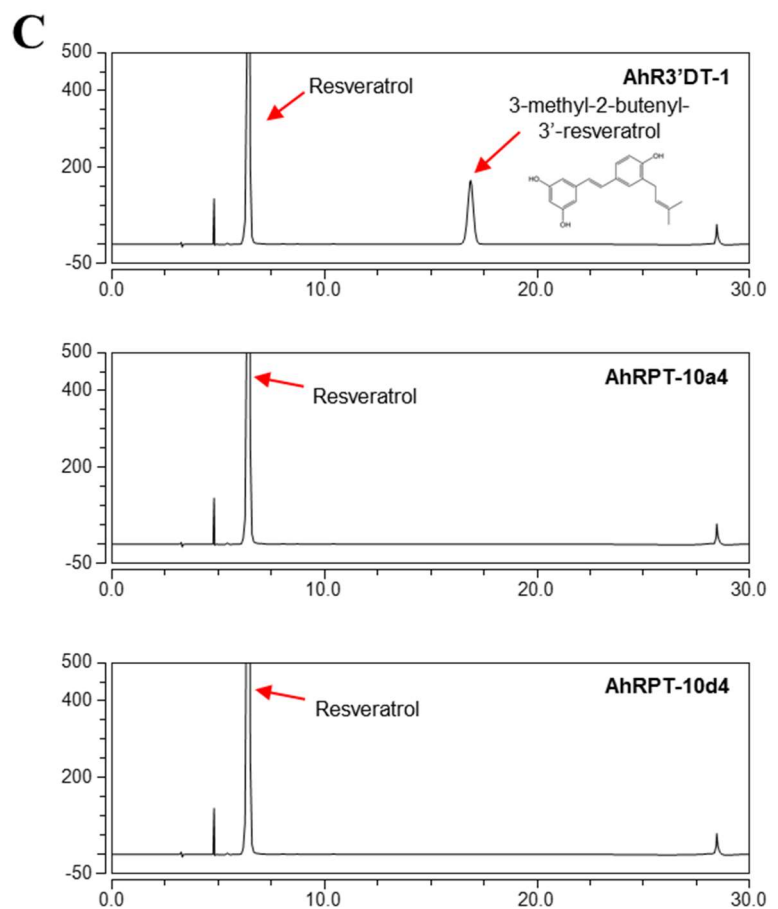

**Figure S3. Comparison of AhR3'DT-1, AhRPT-10a4 and AhRPT-10d4.**

(A) Alignment of AhR3'DT-1, AhRPT-10a4 and AhRPT-10d4 was performed using ClustalX.

(B) Potential transmembrane domains of AhR3'DT-1, AhRPT-10a4 and AhRPT-10d4 were predicted by TMHMM.

(C) Resveratrol prenylation activity of AhR3'DT-1, AhRPT-10a4 and AhRPT-10d4 were analyzed by using HPLC.

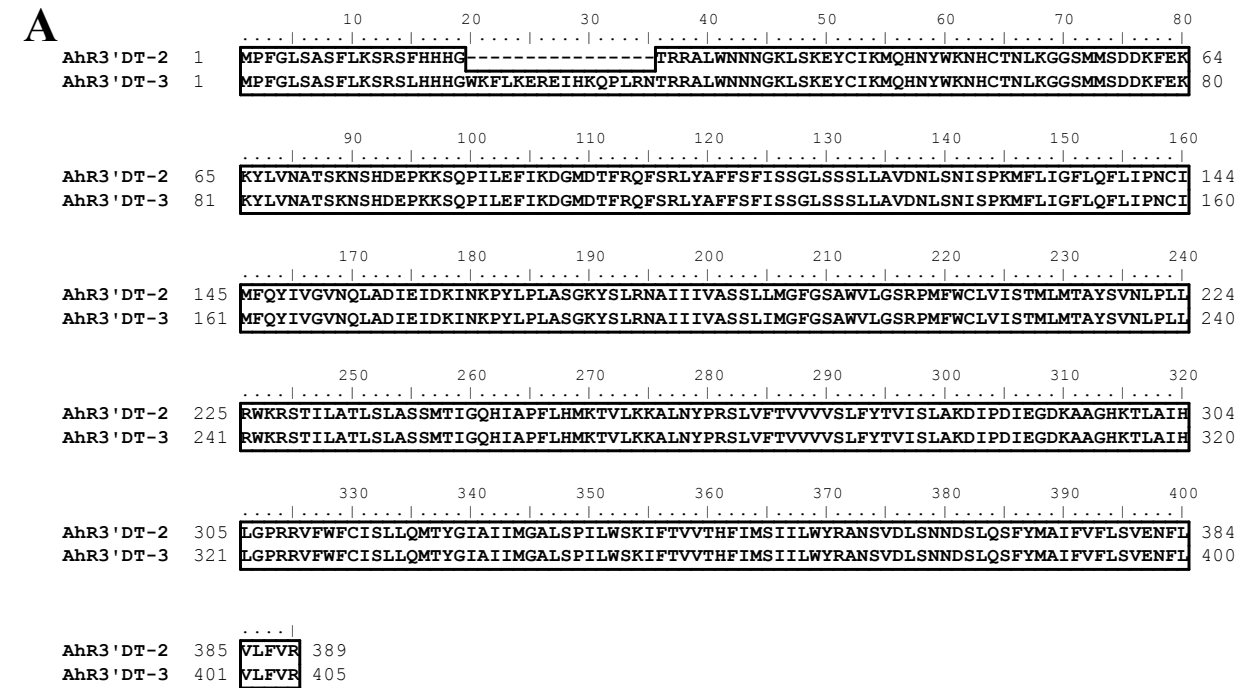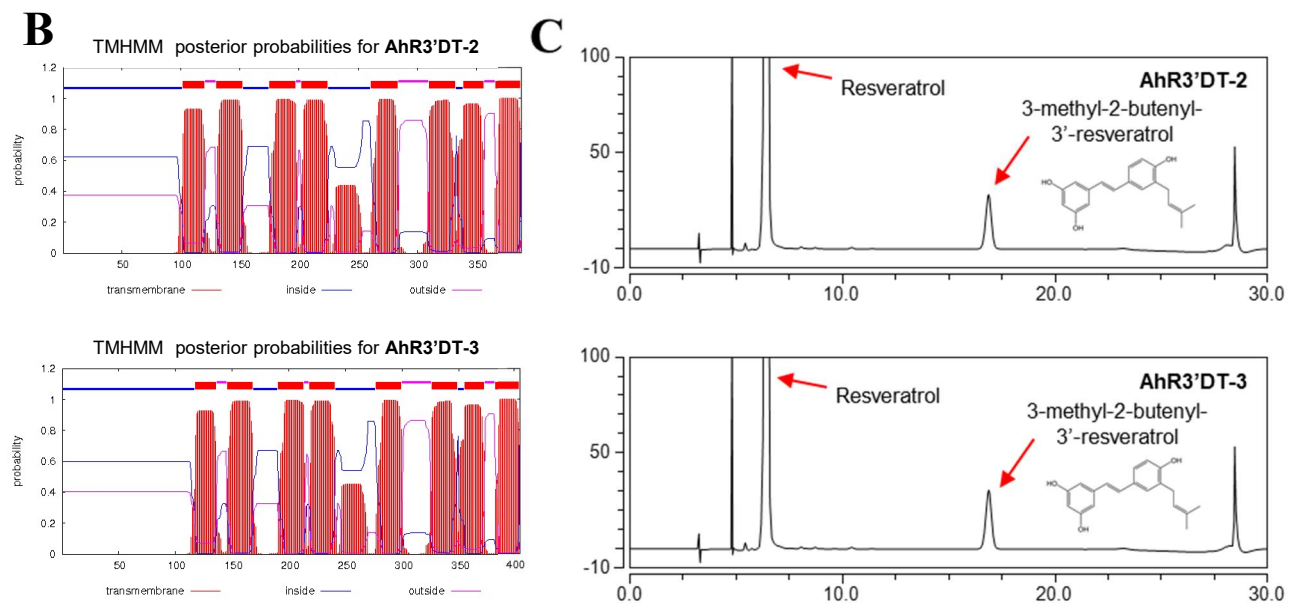

**Figure S4. Comparison of AhR3'DT-2 and AhR3'DT-3.**

(A) Alignment of AhR3'DT-2 with AhR3'DT-3 was performed using ClustalX.

(B) Potential transmembrane domains of AhR3'DT-2 and AhR3'DT-3 were predicted by TMHMM.

(C) Resveratrol prenylation activity of AhR3'DT-2 and AhR3'DT-3 were analyzed by using HPLC.

**A**

```

      10      20      30      40      50      60      70      80
AhR3'DT-4 1  MASTSRLLHSHASLPPPTTSISKTNSSGSHAVIRSIWHNNGKYPKEKTCIETPLLLQHNQKHHTCDQIKRKHVFKATHAQS 80
      90      100     110     120     130     140     150     160
AhR3'DT-4 81  KNEPEPQADSAKPIWNSIKDVMHTIQKFSVFYALIGLLSGILSSLLAVEKLSLSPTEFFISMLQFMAAYSSMQLYTTGV 160
      170     180     190     200     210     220     230     240
AhR3'DT-4 161 NQLADIEIDKINKPYRPLASSKISFGGGLAIVAASLFMSFGLALMIGSKPLLWGLILIFILMTAYSVNLPFLRWKKSTIL 240
      250     260     270     280     290     300     310     320
AhR3'DT-4 241 TLLSGVPTILTAYNLAPYLHMKTFVLKPPFIETRSLAFTTVVMTFFVVISLFDIPDIEGDKKEGLQTLIRLGPKRVF 320
      330     340     350     360     370     380     390
AhR3'DT-4 321 WLCISLLEMTYGIALIMGLTSPFLWSKIFTVMAHAINAWILWFRANSVDLKSKEFQSFYMFIFKLLYLENVLVLFVR 398

```

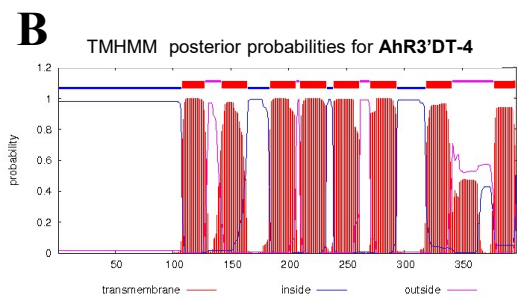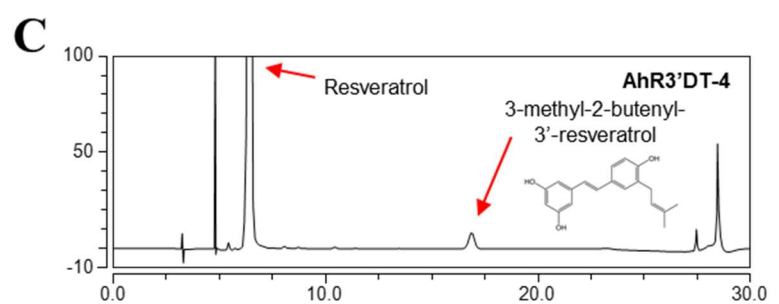

**Figure S5. Structural analysis of AhR3'DT-4.**

**(A)** Primary structure of AhR3'DT-4.

**(B)** Potential transmembrane domains of AhR3'DT-4 was predicted by TMHMM.

**(C)** Resveratrol prenylation activity of AhR3'DT-4 was analyzed by using HPLC.

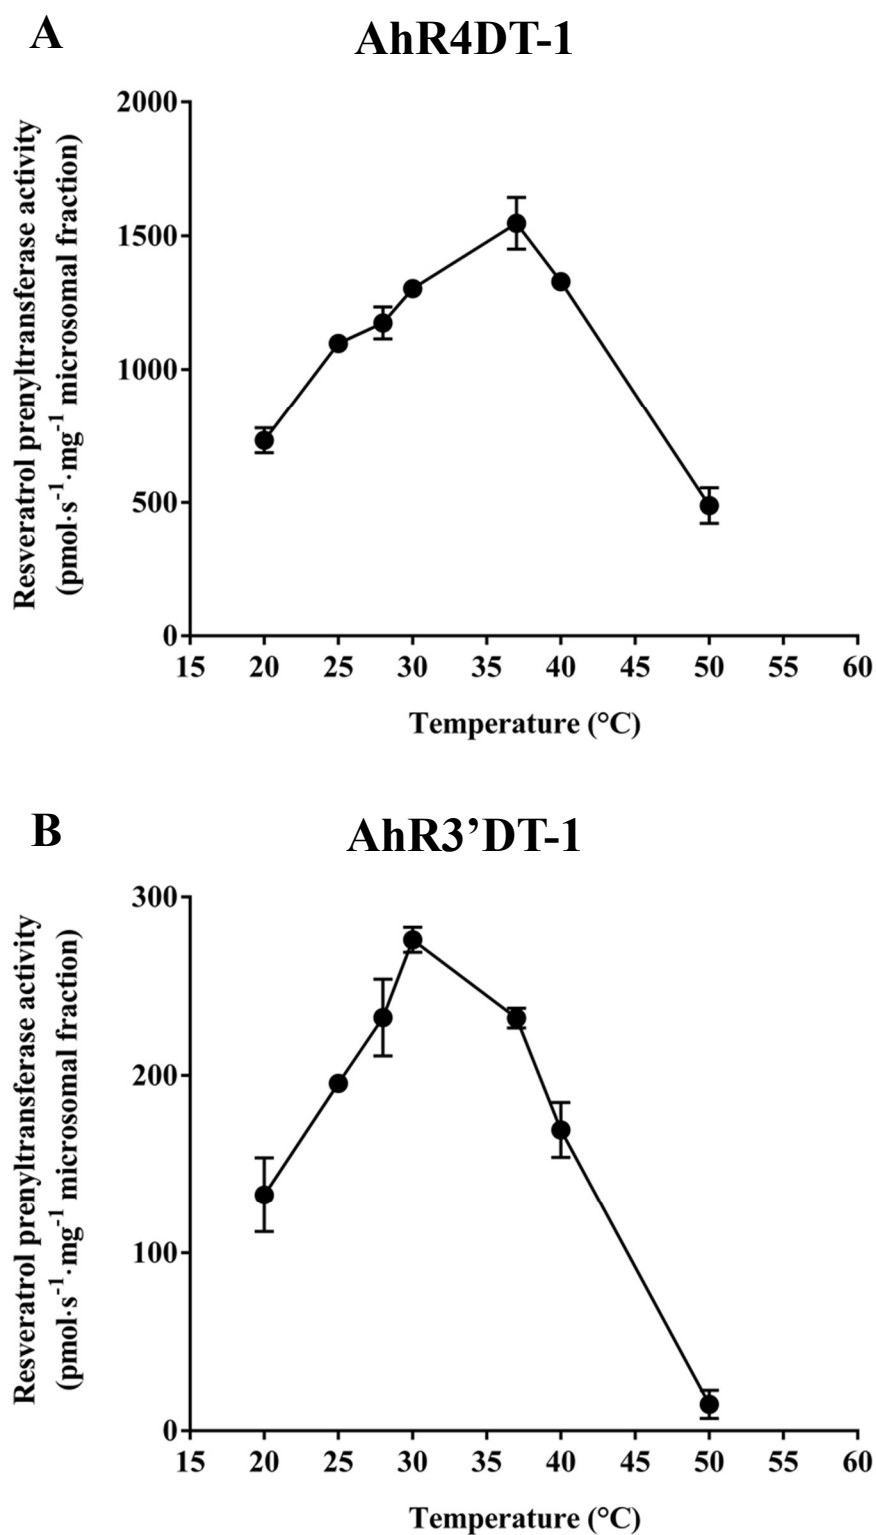

**Figure S6. Temperature dependency of AhR4DT-1 and AhR3'DT-1 activity.** AhR4DT-1 (A) and AhR3'DT-1 (B) activities were measured at various temperature (20, 25, 28, 30, 37, 40 and 50 °C) in 100 mM Tris-HCl buffer (pH 9.0) for 40 mins.

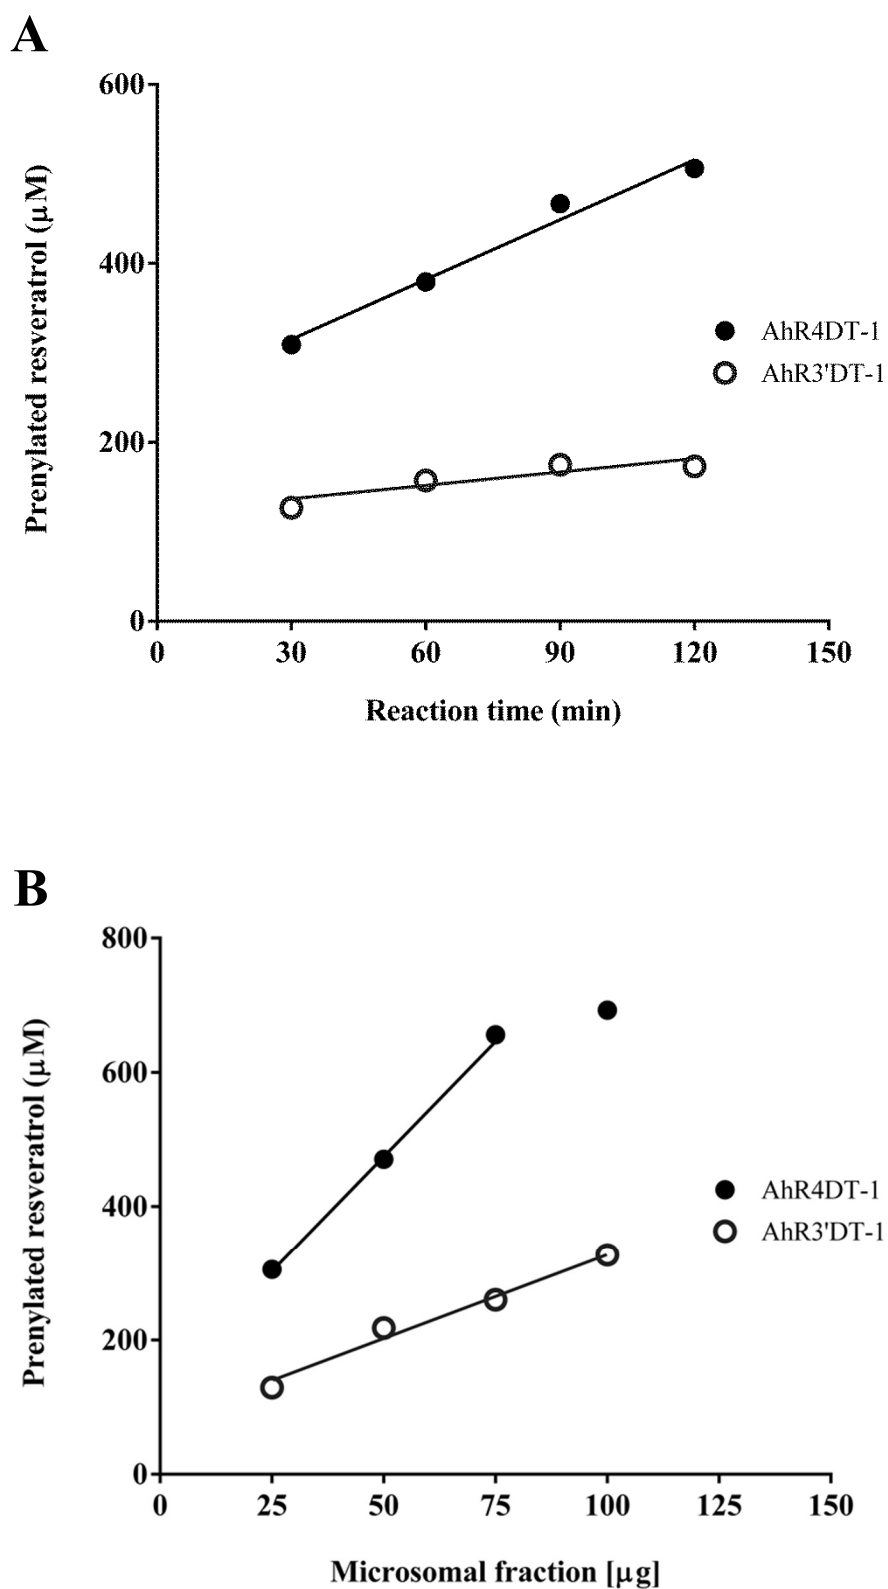

**Figure S7. Resveratrol prenylation activity of AhR4DT-1 and AhR3'DT-1.**

**(A)** Concentrations of generated prenylated resveratrol from AhR4DT-1 and AhR3'DT-1 reaction mixtures with varying incubation times (30, 60, 90 and 120 min) were quantified by HPLC.

**(B)** Concentrations of generated prenylated resveratrol from AhR4DT-1 and AhR3'DT-1 reaction mixtures with varying amounts of microsomal fraction (25, 50, 75 and 100 µg) were quantified by HPLC.



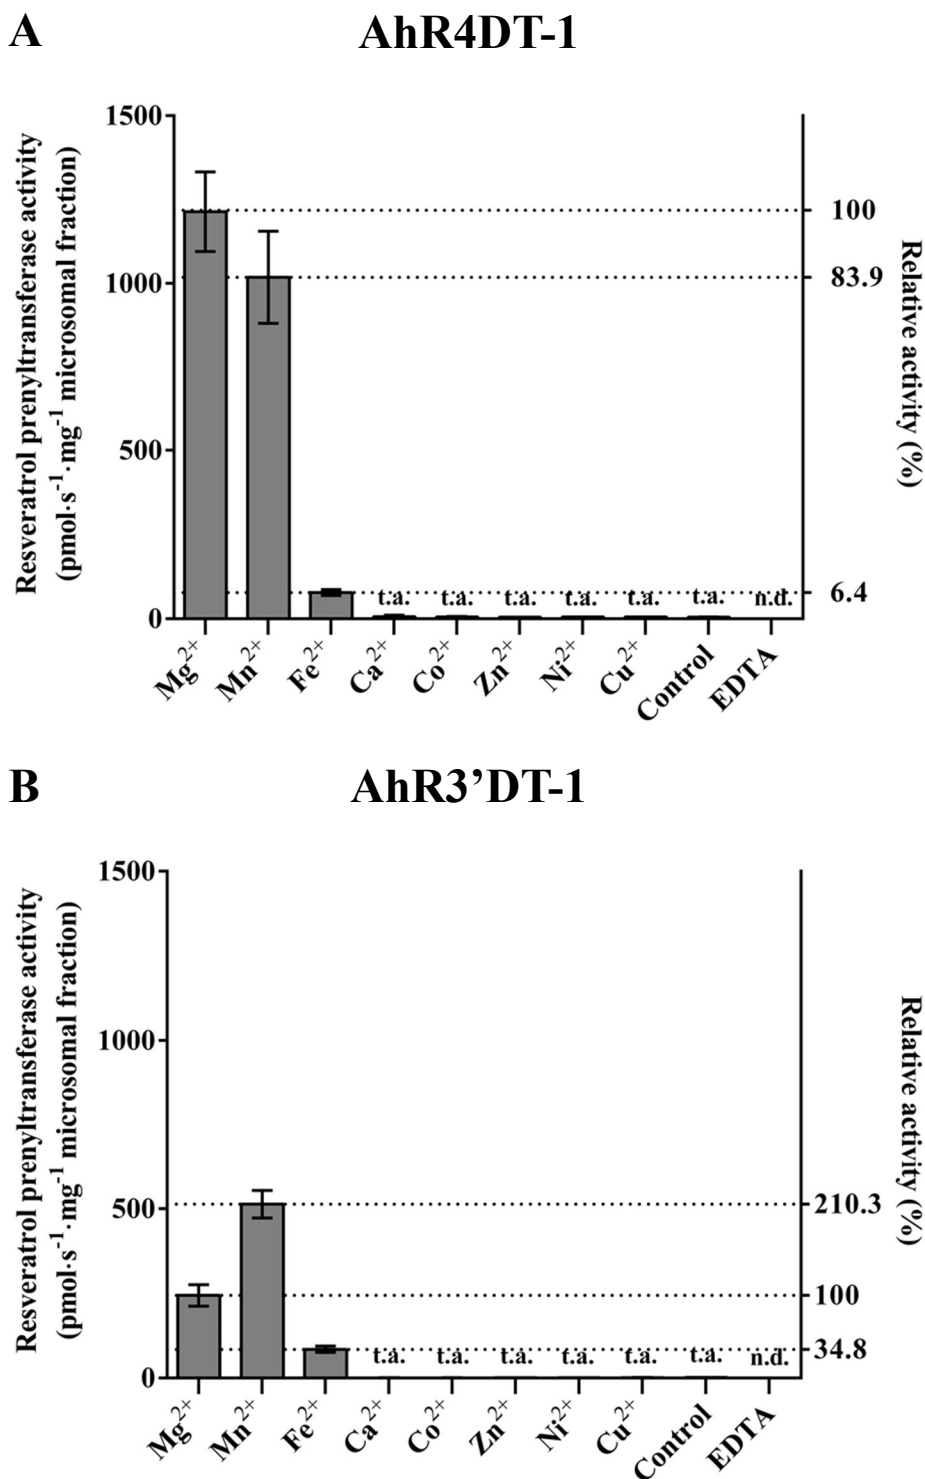

**Figure S8. Divalent cation dependency of AhR4DT-1 and AhR3'DT-1 activity.**

AhR4DT-1 (A) and AhR3'DT-1 (B) activity with various divalent cation were measured with 10 mM MnCl<sub>2</sub>, FeCl<sub>2</sub>, CaCl<sub>2</sub>, CoCl<sub>2</sub>, ZnCl<sub>2</sub>, NiCl<sub>2</sub>, or CuCl<sub>2</sub> and the enzyme activity was compared with the reaction of 10 mM MgCl<sub>2</sub>. Reactions without divalent cation and 10 mM EDTA instead of MgCl<sub>2</sub> were used as controls. All the reactions were performed in 100 mM Tris-HCl buffer (pH 9.0) at 28 °C for 40 min. (t.a., trace amount (<0.5%), n.d., Not detected.). Means and the standard deviation (error bars) were calculated from three replicates.

## AhR4DT-1

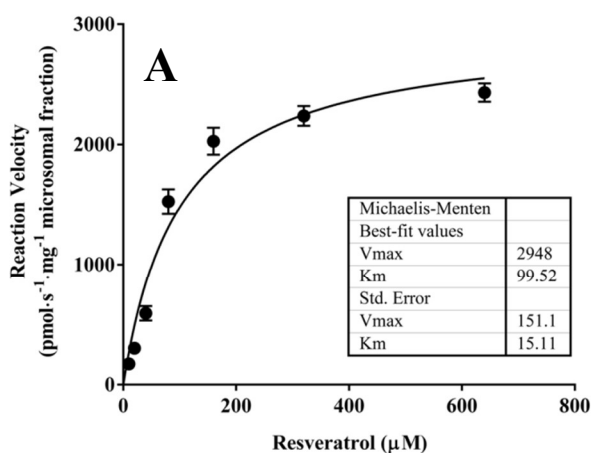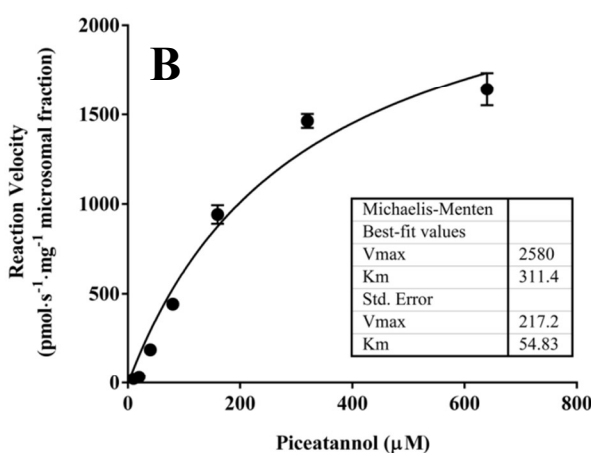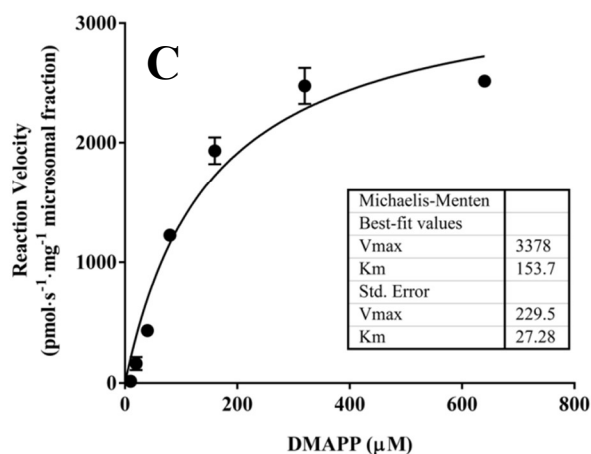

## AhR3'DT-1

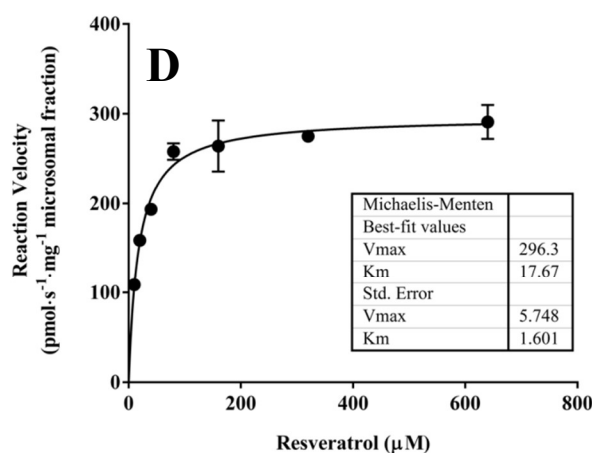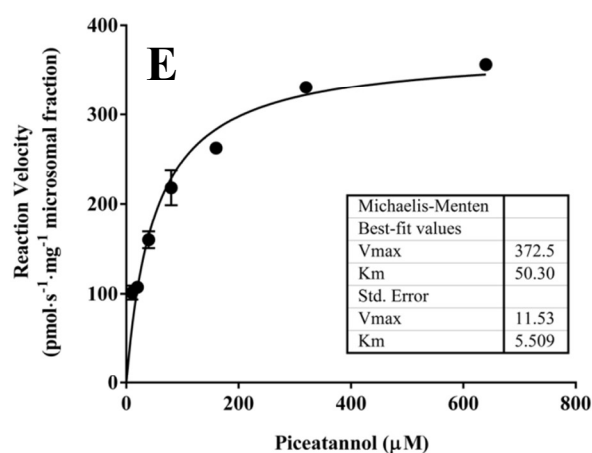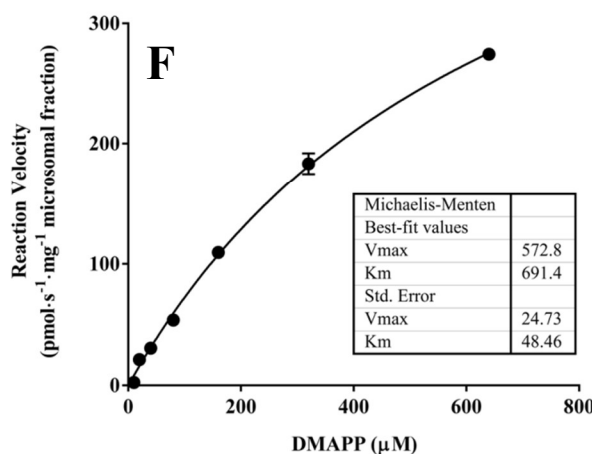

**Figure S9. Kinetic values of AhR4DT-1 and AhR3'DT-1.**

Dependency of AhR4DT-1 (left) and AhR3'DT-1 (right) on the concentration of resveratrol (A&D), piceatannol (B&E) and DMAPP (C&F) measured with a microsomal fraction from leaves of *Nicotiana benthamiana*. The apparent  $K_m$  and  $V_{max}$  values for resveratrol and piceatannol were determined with varying concentrations (10~640  $\mu\text{M}$ ) using 640  $\mu\text{M}$  DMAPP as prenyl donor, while that for DMAPP were determined with varying concentrations (10~640  $\mu\text{M}$ ) using 640  $\mu\text{M}$  resveratrol as prenyl acceptor. All the values were calculated from nonlinear regression analysis with Michaelis-Menten equation by Graphpad Prism 6 software. Means and the standard deviation (error bars) were calculated from three replicates.

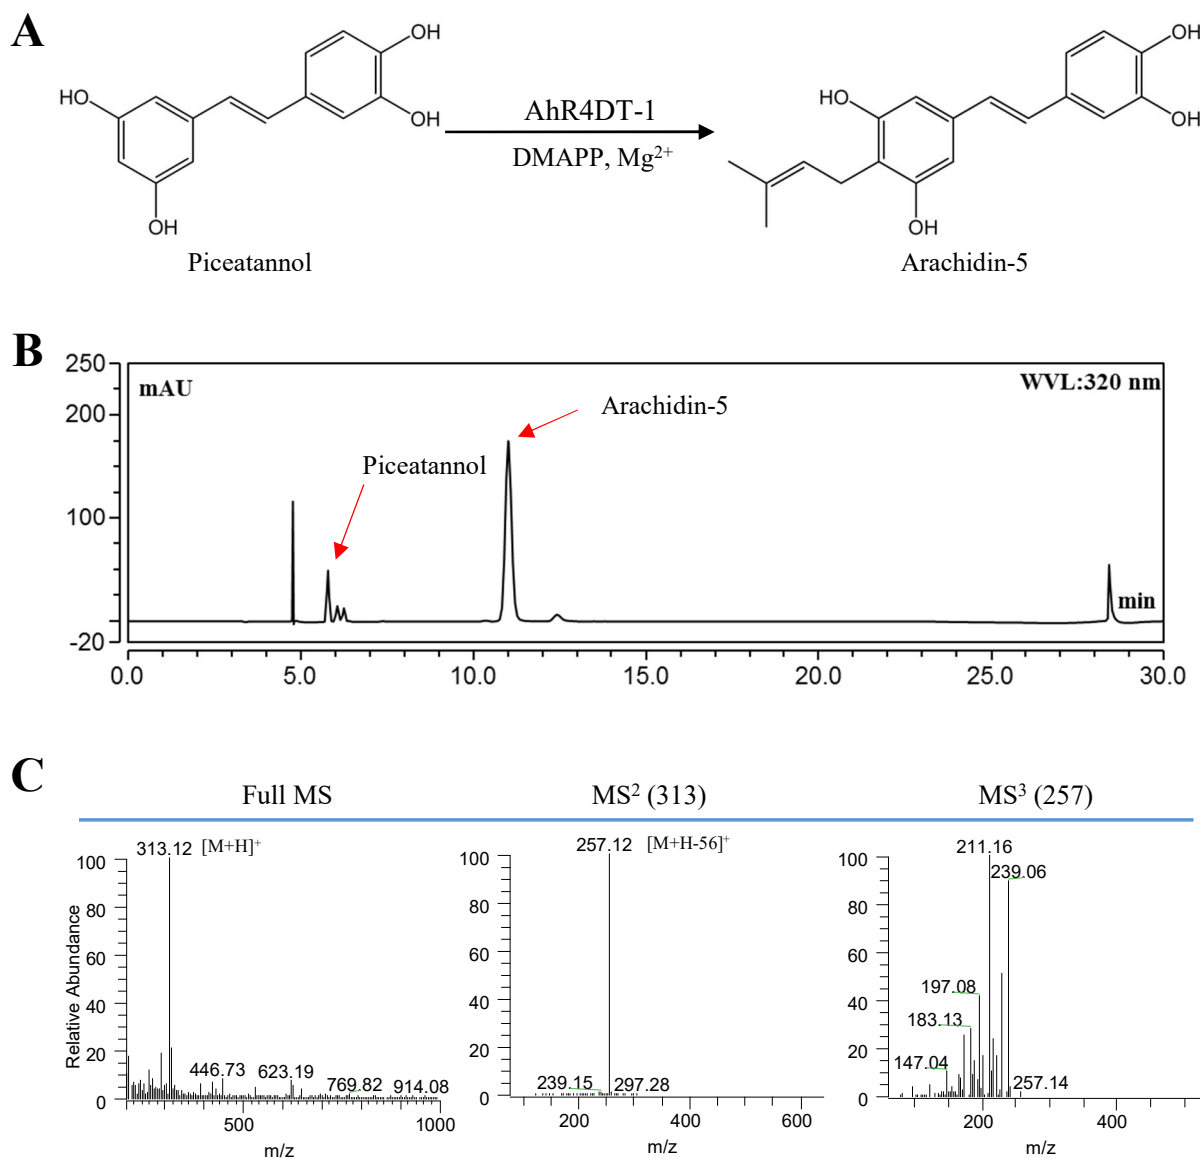

**Figure S10. Prenylation of piceatannol by AhR4DT-1.**

Substrate specificity of AhR4DT-1 in microsomal fraction of *Nicotiana benthamiana* leaf after vacuum infiltration with *Agrobacterium tumefaciens* LBA4404 harboring pBIB-Kan-AhR4DT-1.

(A) Chemical structures of piceatannol and its prenylated product.

(B) HPLC chromatograms (UV 320 nm) of ethyl acetate extraction of reaction mixtures contained 100  $\mu\text{M}$  piceatannol, 300  $\mu\text{M}$  DMAPP, 10 mM  $\text{MgCl}_2$ , 5 mM DTT and 30  $\mu\text{g}$  microsomal fraction in a pH 9.0 Tris-HCl buffer for 40 min.

(C) HPLC-PAD-ESI-MS<sup>3</sup> analysis of prenylated product, arachidin-5.

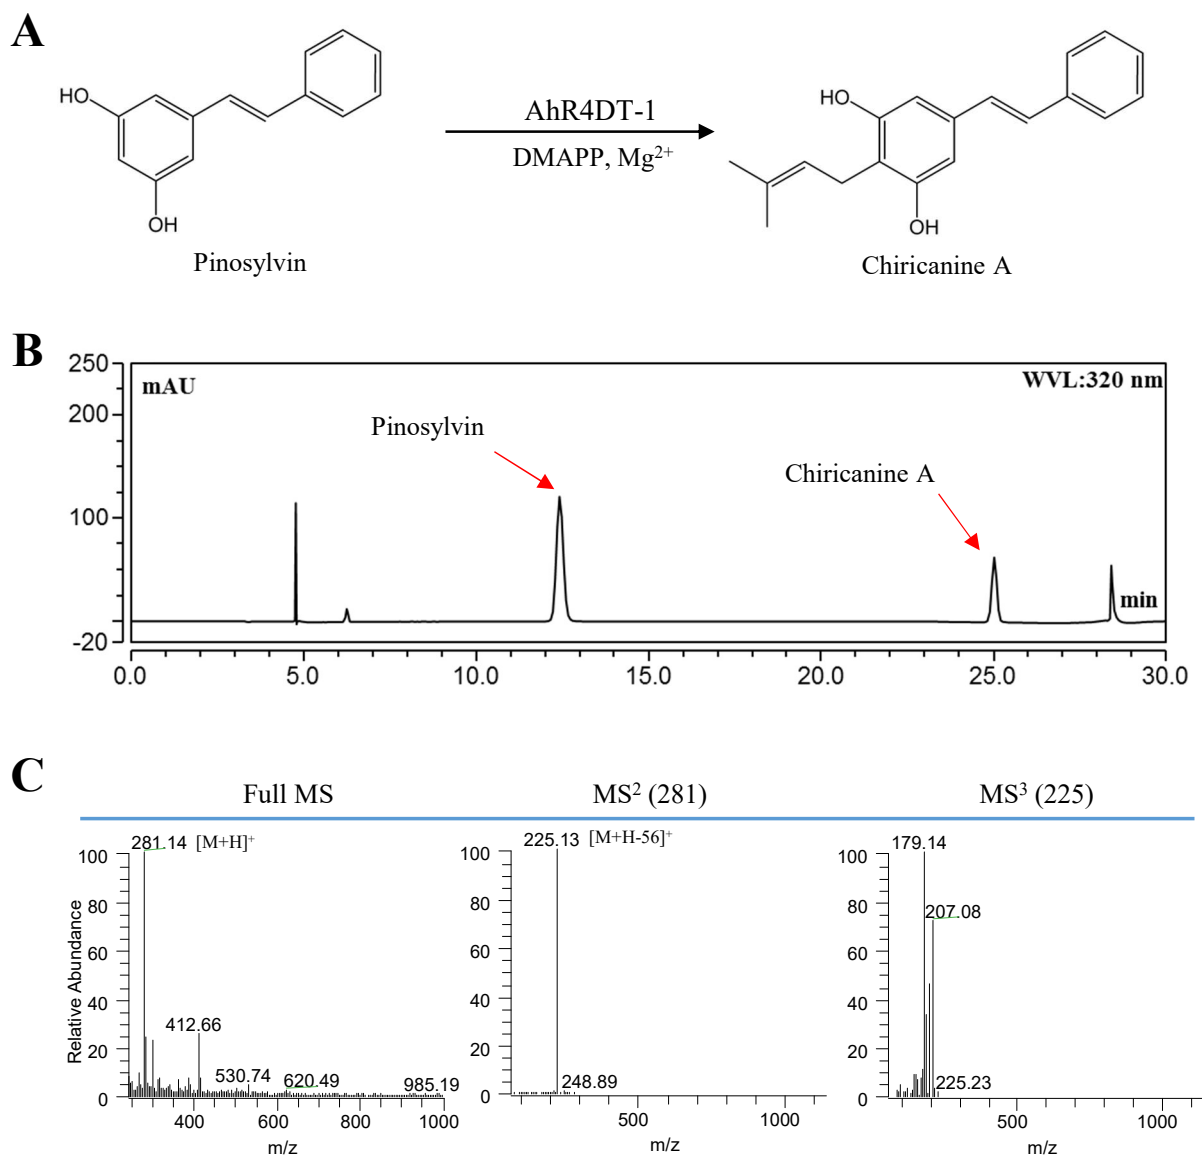

**Figure S11. Prenylation of pinosylvin by AhR4DT-1.**

Substrate specificity of AhR4DT-1 in microsomal fraction of *Nicotiana benthamiana* leaf after vacuum infiltration with *Agrobacterium tumefaciens* LBA4404 harboring pBIB-Kan-AhR4DT-1.

(A) Chemical structures of pinosylvin and its prenylated product.

(B) HPLC chromatograms (UV 320 nm) of ethyl acetate extraction of reaction mixtures contained 100  $\mu$ M pinosylvin, 300  $\mu$ M DMAPP, 10 mM  $MgCl_2$ , 5 mM DTT and 30  $\mu$ g microsomal fraction in a pH 9.0 Tris-HCl buffer for 40 min.

(C) HPLC-PAD-ESI-MS<sup>3</sup> analysis of prenylated product, chiricanine A.

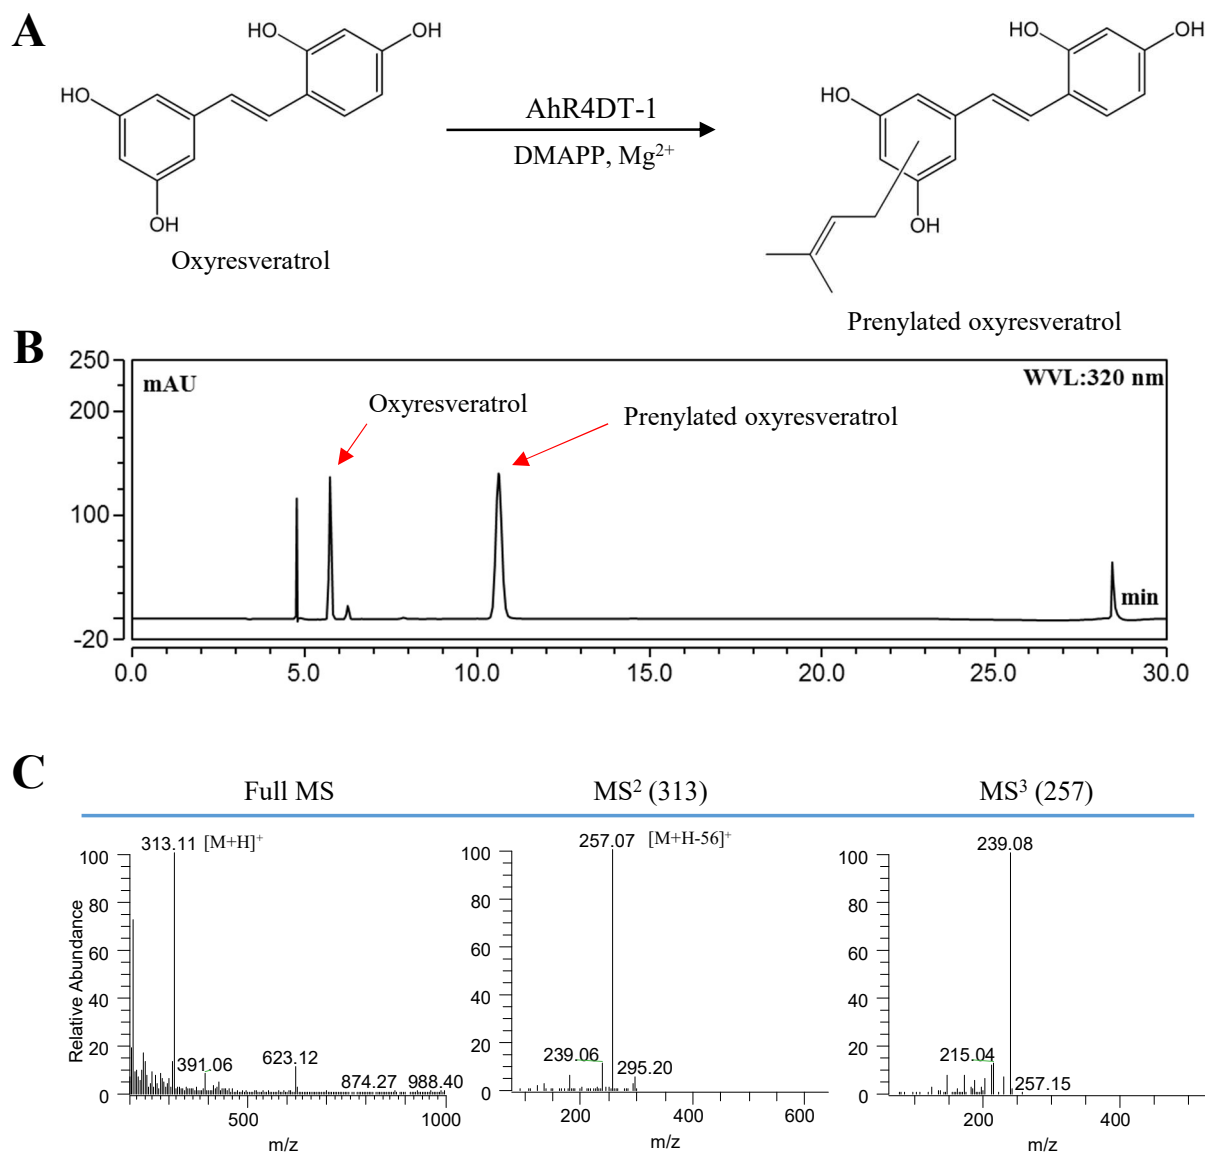

**Figure S12. Prenylation of oxyresveratrol by AhR4DT-1.**

Substrate specificity of AhR4DT-1 in microsomal fraction of *Nicotiana benthamiana* leaf after vacuum infiltration with *Agrobacterium tumefaciens* LBA4404 harboring pBIB-Kan-AhR4DT-1.

(A) Chemical structures of oxyresveratrol and its prenylated product.

(B) HPLC chromatograms (UV 320 nm) of ethyl acetate extraction of reaction mixtures contained 100  $\mu\text{M}$  oxyresveratrol, 300  $\mu\text{M}$  DMAPP, 10 mM  $\text{MgCl}_2$ , 5 mM DTT and 30  $\mu\text{g}$  microsomal fraction in a pH 9.0 Tris-HCl buffer for 40 min.

(C) HPLC-PAD-ESI- $\text{MS}^3$  analysis of prenylated product.

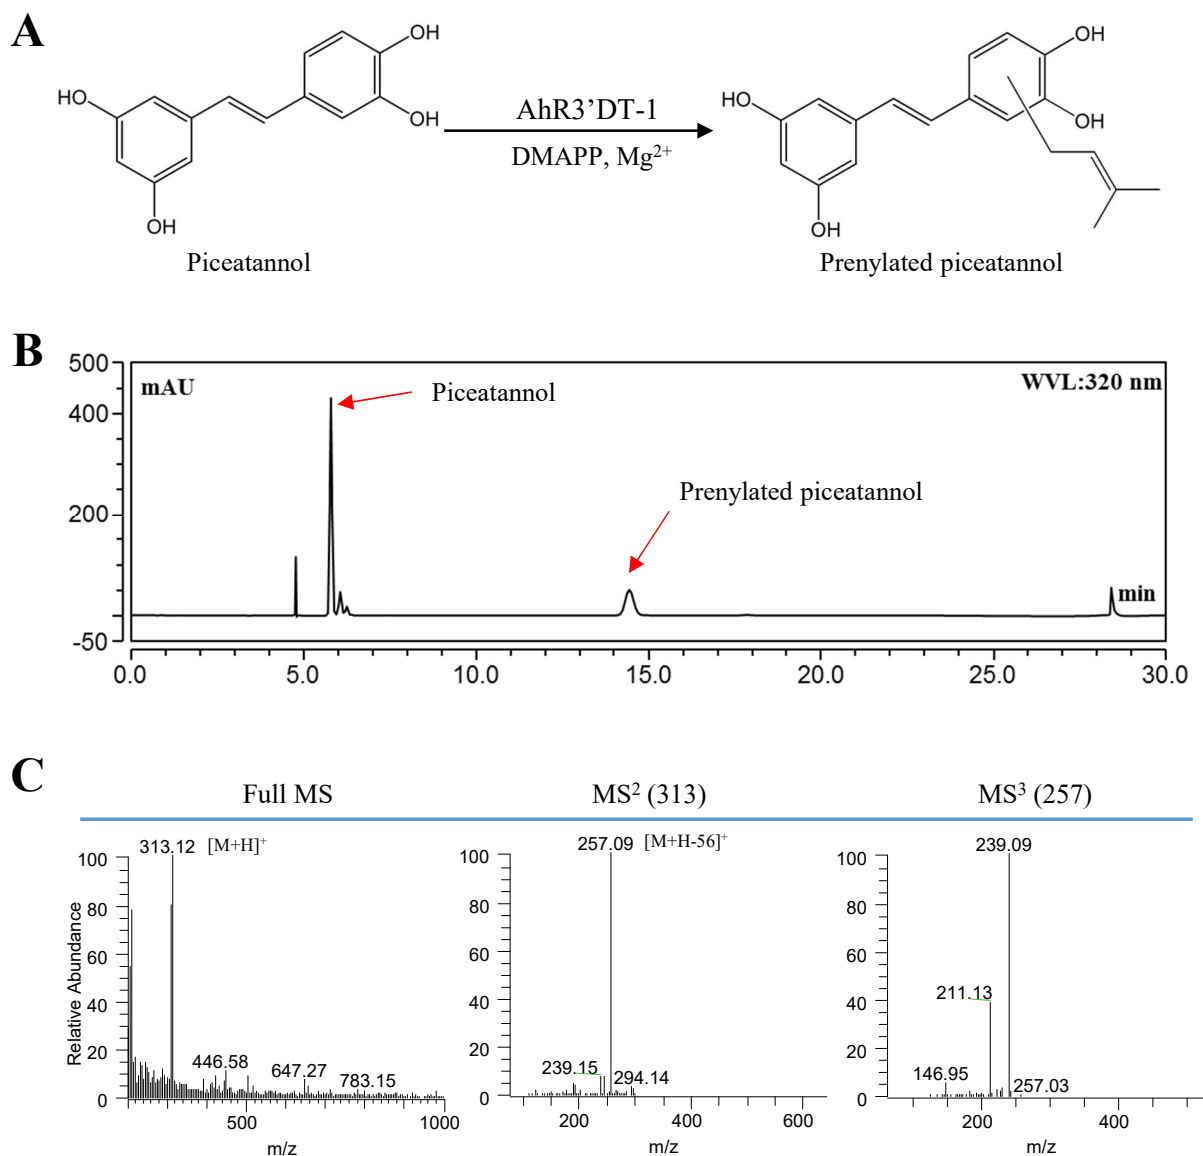

**Figure S13. Prenylation of piceatannol by AhR3'DT-1.**

Substrate specificity of AhR3'DT-1 in microsomal fraction of *Nicotiana benthamiana* leaf after vacuum infiltration with *Agrobacterium tumefaciens* LBA4404 harboring pBIB-Kan-AhR3'DT-1.

(A) Chemical structures of piceatannol and its prenylated product.

(B) HPLC chromatograms (UV 320 nm) of ethyl acetate extraction of reaction mixtures contained 100  $\mu\text{M}$  piceatannol, 300  $\mu\text{M}$  DMAPP, 10 mM  $\text{MgCl}_2$ , 5 mM DTT and 30  $\mu\text{g}$  microsomal fraction in a pH 9.0 Tris-HCl buffer for 40 min.

(C) HPLC-PAD-ESI-MS<sup>3</sup> analysis of prenylated product.

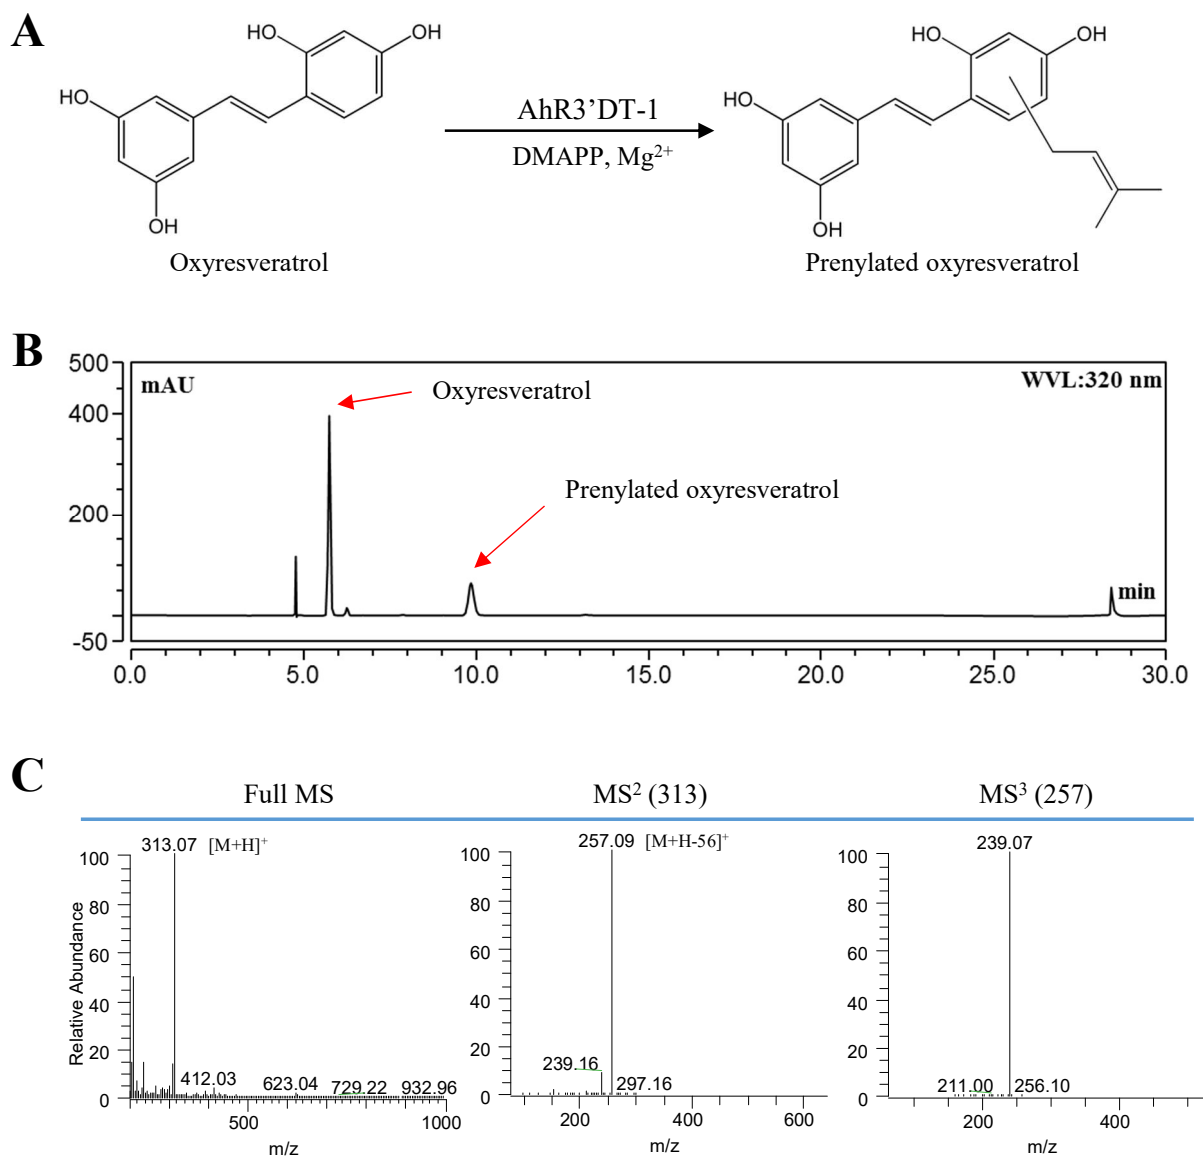

**Figure S14. Prenylation of oxyresveratrol by AhR3'DT-1.**

Substrate specificity of AhR3'DT-1 in microsomal fraction of *Nicotiana benthamiana* leaf after vacuum infiltration with *Agrobacterium tumefaciens* LBA4404 harboring pBIB-Kan-AhR3'DT-1.

(A) Chemical structures of oxyresveratrol and its prenylated product.

(B) HPLC chromatograms (UV 320 nm) of ethyl acetate extraction of reaction mixtures contained 100  $\mu\text{M}$  oxyresveratrol, 300  $\mu\text{M}$  DMAPP, 10 mM  $\text{MgCl}_2$ , 5 mM DTT and 30  $\mu\text{g}$  microsomal fraction in a pH 9.0 Tris-HCl buffer for 40 min.

(C) HPLC-PAD-ESI- $\text{MS}^3$  analysis of prenylated product.

**Table S1. List of primers used in this study.**

The restriction site on each primer is underlined.

| Name                                        | Sequence (5'-3')                                   | Reference              |
|---------------------------------------------|----------------------------------------------------|------------------------|
| First screening for prenyltransferase gene  |                                                    |                        |
| PT-10-FW- <i>NotI</i>                       | TAG <u>CGGCCGC</u> ATGGCTTTTGGTGTTGTTGCTGC         | This study             |
| PT-a-RV- <i>KpnI</i>                        | ATCGAT <u>GGTACCT</u> ATTTTTTAAGAAGTTTTTTACTGC     | This study             |
| PT-d-RV- <i>KpnI</i>                        | ATCGATG <u>AGGTACCT</u> CATGGAAATAGTTGAACAGAGAG    | This study             |
| PT-k-RV- <i>KpnI</i>                        | CGAT <u>GGTACCT</u> CATCTAACAAAAAGCATAAGAATATTTTC  | This study             |
| Second screening for prenyltransferase gene |                                                    |                        |
| PT-4-FW- <i>NotI</i>                        | TAG <u>CGGCCGC</u> ATGCCTTTCGGACTCTCCGC            | This study             |
| PT-5-FW- <i>NotI</i>                        | TAG <u>CGGCCGC</u> ATGGCTTCCACTTCCAGGCT            | This study             |
| PT-6-FW- <i>NotI</i>                        | TAG <u>CGGCCGC</u> ATGGCTTTTAGGCTTCTAGGATC         | This study             |
| PT-9-FW- <i>NotI</i>                        | TAG <u>CGGCCGC</u> ATGGCTTTTGGGCATTTGGTGT          | This study             |
| PT-b-RV- <i>KpnI</i>                        | CTG <u>AGGTACCT</u> CAACGAACAAATTGTATAAGGATG       | This study             |
| PT-c-RV- <i>KpnI</i>                        | CTG <u>AGGTACCT</u> TATCTCACGAAAAGTATAAGGATG       | This study             |
| PT-e-RV- <i>KpnI</i>                        | CTG <u>AGGTACCT</u> CATCGAACAAAAAGTACAAGGAAG       | This study             |
| PT-i-RV- <i>KpnI</i>                        | CTG <u>AGGTACCT</u> TAGTTATTGGTTACCTTAAACATA       | This study             |
| PT-m-RV- <i>KpnI</i>                        | CTG <u>AGGTACCT</u> TATCTCACAAAAAGCACAAGGACA       | This study             |
| Promoter cloning                            |                                                    |                        |
| Ca35S-FW- <i>SalI</i> -1                    | ATCGAT <u>GTCGACA</u> AAGCTTGCATGCCTG              | This study             |
| TEV-RW- <i>NotI</i>                         | ATCGAT <u>GCGGCCGC</u> GCTATCGTTCGTAATGGTGA        | This study             |
| GFP fusion protein cloning                  |                                                    |                        |
| mgfp5-FW- <i>BamHI</i>                      | ATCGAT <u>GGATCC</u> ATGGCTAGTAAAGGAGAAGAAGCTTTTC  | This study             |
| mgfp5-FW- <i>NotI</i>                       | ATCGAT <u>GCGGCCGC</u> ATGGCTAGTAAAGGAGAAGAAGCTTTT | This study             |
| mgfp5-RW- <i>KpnI</i>                       | ATCGAT <u>GGTACCT</u> CATTTGTATAGTTCATCCAT         | This study             |
| PT-10k1-RV- <i>BamHI</i>                    | ATCGAT <u>GGATCC</u> TCTAACAAAAAGCATAAGAA          | This study             |
| PT-9b13-RV- <i>BamHI</i>                    | AT <u>GGATCC</u> ACGAACAAATTGTATAAGGATG            | This study             |
| Ca35S-FW- <i>SalI</i> -2                    | GATACCGTCGACAAGCTTGCATG                            | This study             |
| Real time-quantitative PCR                  |                                                    |                        |
| AHR4DT-1-FW                                 | ACTTCTGGAGTTATACTTGTG                              | This study             |
| AHR4DT-1-RV                                 | TAGATAGTGATGTGAGGATTATAG                           | This study             |
| AHR3'DT-1-FW                                | GCAGCATAATTGGAAGCA                                 | This study             |
| AHR3'DT-1-RV                                | GGAAAGCATCTAAAGCATCA                               | This study             |
| JC1-FW                                      | TATGTATTTAACAGAAGAAATAC                            | (Condori et al., 2009) |
| JC1-RV                                      | AGTTGCAGCCTCTTTTCCAAC                              | (Condori et al., 2009) |
| ACT7-FW                                     | ATGTATGTAGCCATCCAAG                                | (Condori et al., 2011) |
| ACT7-RV                                     | ACCAGAGTCCAGAACAATA                                | (Condori et al., 2011) |
| EF1 $\alpha$ -FW                            | GGTGTCAAGCAGATGATT                                 | (Condori et al., 2011) |
| EF1 $\alpha$ -RV                            | ACTTCCTCACGATTCA                                   | (Condori et al., 2011) |



**Table S2. Substrates used for specificity assay and the prenylated products from reaction mixtures catalyzed by AhR4DT-1 or AhR3'DT-1.**

Analysis was done by HPLC-PDA-electrospray ionization-MS<sup>3</sup>.

| No | Analyte                                | <i>t<sub>R</sub></i> (min) | UV (nm)       | [M+H] <sup>+</sup> (m/z) | MS <sup>2</sup> ions             | MS <sup>3</sup> ions  |
|----|----------------------------------------|----------------------------|---------------|--------------------------|----------------------------------|-----------------------|
| 1  | Oxyresveratrol                         | 5.74                       | 243, 302, 328 | 245                      | 227                              | <b>209</b> , 199, 157 |
| 2  | Piceatannol                            | 5.79                       | 240, 324      | 245                      | 227, 199, <b>135<sup>a</sup></b> | 107                   |
| 3  | Resveratrol                            | 6.50                       | 237, 306, 317 | 229                      | <b>211</b> , 183                 | 107                   |
| 4  | Prenylated oxyresveratrol by AhR3'DT-1 | 9.85                       | 225, 325      | 313                      | 257                              | 239                   |
| 5  | Prenylated oxyresveratrol by AhR4DT-1  | 10.63                      | 225, 304, 329 | 313                      | 257                              | 239                   |
| 6  | Arachidin-5                            | 11.01                      | 240, 327      | 313                      | <b>257</b>                       | 239, 229, <b>211</b>  |
| 7  | Pinosylvin                             | 12.42                      | 229, 300, 307 | 213                      | 135                              | <b>107</b>            |
| 8  | Arachidin-2                            | 13.84                      | 239, 311, 323 | 297                      | 241                              | 223, 213, <b>195</b>  |
| 9  | Prenylated piceatannol by AhR3'DT-1    | 14.44                      | 228, 325      | 313                      | 257                              | <b>239</b> , 211      |
| 10 | 3-methyl-2-butenyl-3'-resveratrol      | 16.99                      | 230, 320      | 297                      | 241                              | 223                   |
| 11 | Chiricanine A                          | 25.02                      | 209, 314      | 281                      | 225                              | <b>179</b> , 207      |

<sup>a</sup>MS<sup>2</sup> ions in boldface were the most abundant ions and were subjected to MS<sup>3</sup> fragmentation.

**Table S3. List of plasmids used in this study.**

For details of the binary vectors, see Materials and Methods.

| Name                               | Description                                                   | Reference                         |
|------------------------------------|---------------------------------------------------------------|-----------------------------------|
| pBC KS(-)                          | Phagemid vector derived from pBluescript II KS(-)             |                                   |
| pBIB-Kan                           | Binary vector                                                 | (Becker, 1990)                    |
| pR8-2                              | <i>CaMV35S::TEV::pat::mGFP5</i> in pBC KS(-)                  | (Medina-Bolívar and Cramer, 2004) |
| Prenyltransferase Characterization |                                                               |                                   |
| pGEM-CaMV35S-TEV                   | <i>CaMV35S::TEV</i> in pGEM-T                                 | This study                        |
| pBC-CaMV35S-TEV-9b13               | <i>CaMV35S::TEV::AhR4DT-1</i> in pBC KS(-)                    | This study                        |
| pBC-CaMV35S-TEV-10k1               | <i>CaMV35S::TEV::AhR3'DT-1</i> in pBC KS(-)                   | This study                        |
| pBIB-Kan-AhR4DT-1                  | <i>CaMV35S::TEV::AhR4DT-1</i> in pBIB-Kan                     | This study                        |
| pBIB-Kan-AhR3'DT-1                 | <i>CaMV35S::TEV::AhR3'DT-1</i> in pBIB-Kan                    | This study                        |
| pBIB-Kan-AhR3'DT-2                 | <i>CaMV35S::TEV::AhR3'DT-2</i> in pBIB-Kan                    | This study                        |
| pBIB-Kan-AhR3'DT-3                 | <i>CaMV35S::TEV::AhR3'DT-3</i> in pBIB-Kan                    | This study                        |
| pBIB-Kan-AhR3'DT-4                 | <i>CaMV35S::TEV::AhR3'DT-4</i> in pBIB-Kan                    | This study                        |
| Subcellular Localization           |                                                               |                                   |
| pt-rk                              | <i>CaMV35S::RS-TP-mCherry</i> in pBIN20                       | (Nelson et al., 2007)             |
| pGEM-mGFP5-1                       | <i>mGFP5</i> with <i>Bam</i> HI/ <i>Kpn</i> I sites in pGEM-T | This study                        |
| pGEM-mGFP5-2                       | <i>mGFP5</i> with <i>Not</i> I/ <i>Kpn</i> I sites in pGEM-T  | This study                        |
| pGEM-CaMV35S-TEV-AhR4DT-1-GFP      | <i>CaMV35S::TEV::AhR4DT-1::mGFP5</i> in pGEM-T                | This study                        |
| pGEM-CaMV35S-TEV-AhR3'DT-1-GFP     | <i>CaMV35S::TEV::AhR3'DT-1::mGFP5</i> in pGEM-T               | This study                        |
| pBC-CaMV35S-TEV-GFP                | <i>CaMV35S::TEV::mGFP5</i> in pBC KS(-)                       | This study                        |
| pBIB-Kan-AhR4DT-1-GFP              | <i>CaMV35S::TEV::AhR4DT-1::mGFP5</i> in pBIB-Kan              | This study                        |
| pBIB-Kan-AhR3'DT-1-GFP             | <i>CaMV35S::TEV::AhR3'DT-1::mGFP5</i> in pBIB-Kan             | This study                        |
| pBIB-Kan-GFP                       | <i>CaMV35S::TEV::mGFP5</i> in pBIB-Kan                        | This study                        |

**Table S4. Accession numbers of proteins used for phylogenetic analysis.**

| Protein name | Accession number | Description                                   | Organism                          |
|--------------|------------------|-----------------------------------------------|-----------------------------------|
| AaVTE2-1     | ABB70124.1       | homogentisate phytyltransferase VTE2-1        | <i>Allium ampeloprasum</i>        |
| AhR4DT-1     | AQM74172.1       | resveratrol-4-dimethylallyltransferase        | <i>Arachis hypogaea</i>           |
| AhR3'DT-1    | AQM74173.1       | resveratrol-3'-dimethylallyltransferase       | <i>Arachis hypogaea</i>           |
| AhR3'DT-2    | AQM74174.1       | resveratrol-3'-dimethylallyltransferase       | <i>Arachis hypogaea</i>           |
| AhR3'DT-3    | AQM74175.1       | resveratrol-3'-dimethylallyltransferase       | <i>Arachis hypogaea</i>           |
| AhR3'DT-4    | AQM74176.1       | resveratrol-3'-dimethylallyltransferase       | <i>Arachis hypogaea</i>           |
| AtHPT1       | AAM10489.1       | homogentisate phytylprenyltransferase         | <i>Arabidopsis thaliana</i>       |
| AtPPT1       | BAB20818.2       | p-hydroxybenzoate polyprenyltransferase       | <i>Arabidopsis thaliana</i>       |
| AtVTE2-2     | ABB70127.1       | homogentisate phytyltransferase VTE2-2        | <i>Arabidopsis thaliana</i>       |
| CIPT1a       | BAP27988.1       | umbelliferone 8-geranyltransferase            | <i>Citrus limon</i>               |
| CpVTE2-1     | ABB70125.1       | homogentisate phytyltransferase VTE2-1        | <i>Cuphea pulcherrima</i>         |
| CrVTE2-2     | CAL01105.1       | homogentisate prenyltransferase               | <i>Chlamydomonas reinhardtii</i>  |
| CtIDT        | AJD80983.1       | isoliquiritigenin 3'-dimethylallyltransferase | <i>Cudrania tricuspidata</i>      |
| GmG4DT       | BAH22520.1       | pterocarpan 4-dimethylallyltransferase        | <i>Glycine max</i>                |
| GmVTE2-1     | ABB70126.1       | homogentisate phytyltransferase VTE2-1        | <i>Glycine max</i>                |
| GmVTE2-2     | ABB70128.1       | homogentisate phytyltransferase VTE2-2        | <i>Glycine max</i>                |
| GuA6DT       | AIT11912.1       | flavone prenyltransferase                     | <i>Glycyrrhiza uralensis</i>      |
| HIPT-1       | BAJ61049.1       | aromatic prenyltransferase                    | <i>Humulus lupulus</i>            |
| HvHGGT       | AAP43911.1       | homogentisic acid geranylgeranyl transferase  | <i>Hordeum vulgare</i>            |
| LaPT-1       | AER35706.1       | genistein 3'-dimethylallyltransferase         | <i>Lupinus albus</i>              |
| LePGT-1      | BAB84122.1       | 4-hydroxybenzoate geranyltransferase          | <i>Lithospermum erythrorhizon</i> |
| LePGT-2      | BAB84123.1       | 4-hydroxybenzoate geranyltransferase          | <i>Lithospermum erythrorhizon</i> |
| MaIDT        | AJD80982.1       | isoliquiritigenin 3'-dimethylallyltransferase | <i>Morus alba</i>                 |
| OsHGGT       | AAP43913.1       | homogentisic acid geranylgeranyl transferase  | <i>Oryza sativa</i>               |
| OsPPT1       | BAE96574.1       | p-hydroxybenzoate polyprenyltransferase       | <i>Oryza sativa</i>               |
| PcPT         | BAO31627.1       | umbelliferone 6-dimethylallyltransferase      | <i>Petroselinum crispum</i>       |
| SfG6DT       | BAK52291.1       | genistein 6-dimethylallyltransferase          | <i>Sophora flavescens</i>         |
| SfILD        | BAK52290.1       | isoliquiritigenin dimethylallyltransferase    | <i>Sophora flavescens</i>         |
| SfN8DT-1     | BAG12671.1       | naringenin 8-dimethylallyltransferase         | <i>Sophora flavescens</i>         |
| SfN8DT-2     | BAG12673.1       | naringenin 8-dimethylallyltransferase         | <i>Sophora flavescens</i>         |
| SfN8DT-3     | BAK52289.1       | naringenin 8-dimethylallyltransferase         | <i>Sophora flavescens</i>         |
| TaHGGT       | AAP43912.1       | homogentisic acid geranylgeranyl transferase  | <i>Triticum aestivum</i>          |
| TaVTE2-1     | ABB70123.1       | homogentisate phytyltransferase VTE2-1        | <i>Triticum aestivum</i>          |
| ZmVTE2-1     | ABB70122.1       | homogentisate phytyltransferase VTE2-1        | <i>Zea mays</i>                   |
